# Supplementary material
Source: publisher figshare collection journal article supplement (https://acs.figshare.com/ndownloader/files/7597705)
Supplement: Supplementary file 1 [file 7597705]

# SUPPORTING INFORMATION

## Melted Paraffin Wax as an Innovative Liquid and Solid Extractant for Elemental Analysis by Laser-Induced Breakdown Spectroscopy

Rodrigo Papai,<sup>†</sup> Roseli Hiromi Sato,<sup>†</sup> Lidiane Cristina Nunes,<sup>‡</sup> Francisco José Krug,<sup>‡</sup> and Ivanise Gaubeur<sup>\*,†</sup>

<sup>†</sup>CCNH, Centro de Ciências Naturais e Humanas, Universidade Federal do ABC, UFABC, Avenida dos Estados, 5001, Bloco B, 09210-580, Santo André, São Paulo Brazil

<sup>‡</sup>CENA, Centro de Engenharia Nuclear na Agricultura, Universidade de São Paulo, Av. Centenário 303, 13416-000, Piracicaba, São Paulo Brazil

**\*Corresponding author:** Ivanise Gaubeur

Email: ivanise.gaubeur@ufabc.edu.br

Fax: +55 11 4996-0187

### Table of Contents

**Table S1.** GF AAS heating program for copper determination in aqueous samples.

**Table S2.** Order of addition and quantities used in the extraction procedure after optimization

**Figure S1.** LIBS spectrum paraffin wax (method blank) in range 200-780 nm, evidencing the characteristic electronic transition of carbon at C I 247.856 nm.

**Figure S2.** Efficiency of Triton X-100 as a protective colloid. (a) Absorbance (446 nm) versus time. Complex solution prepared by the addition of 750  $\mu\text{L}$  of 0.010 g  $\text{L}^{-1}$  copper reference solution in a mixture containing 750  $\mu\text{L}$  of 0.021 mol  $\text{L}^{-1}$  DDTC solution, 1200  $\mu\text{L}$  of acid citric solution ( $\text{pH} = 5.0$ ; 1.5 mol  $\text{L}^{-1}$ ), 300  $\mu\text{L}$  of 2.5 g  $\text{L}^{-1}$  Triton X-100 solution (in the presence of surfactant) and 300  $\mu\text{L}$  of deionized water (in the absence of surfactant). (b) The inset represent the  $[\text{Cu}(\text{DDTC})_2]$  spectrum in the presence of Triton X-100 and  $\text{pH} = 5.0$ .

**Figure S3.** Influence of (a)  $\text{pH}$ ; (b) DDTC:Cu(II) ratio; (c) Triton X-100 concentration. (d) vortex agitation time; (e) time complexation and (f) different types of paraffin wax on the analytical signal and the standard deviation obtained by LIBS. Experiments in triplicate ( $n = 3$ ). Fixed  $[\text{Cu}^{2+}] = 1.57 \times 10^{-4}$  mol  $\text{L}^{-1}$ , 25 laser pulses of 50 J  $\text{cm}^{-2}$  (230 mJ per pulse; 750  $\mu\text{m}$  laser spot size) at 2.0  $\mu\text{s}$  delay and 5.0  $\mu\text{s}$  integration time.

**Figure S4.** Linear regression forcing zero in intercept of the amount of copper extracted in the function of the initial amount in aqueous solution. Linear regression equation ( $y = 0.941 (\pm 0.002) x$ ,  $R^2 = 0.9997$ ,  $n = 7$ ). Vertical error bars refer to  $\pm 1$  standard deviation of triplicate ( $n = 3$ ).

**Figure S5.** AFM images relating to paraffin waxes extracts containing different concentrations of  $[\text{Cu}(\text{DDTC})_2]$ . (A) paraffin wax without  $[\text{Cu}(\text{DDTC})_2]$  – method blank (B) extract to the solution of 0.75 mg  $\text{L}^{-1}$  of copper (C) extract to the solution 2.50 mg  $\text{L}^{-1}$  of copper, (D) extract to the solution 5.00 mg  $\text{L}^{-1}$  of copper and (E) extract to the solution 7.50 mg  $\text{L}^{-1}$  of copper. Each image covered an area of 45  $\mu\text{m} \times 45 \mu\text{m}$  and is representative of three different regions of each sample.

### Supplementary experimental section

**Table S1. GF AAS heating program for copper determination in aqueous samples.**

| Type      | Temperature (°C) | Ramp (°C/s) | Hold (s) | Argon Gas Flow          |
|-----------|------------------|-------------|----------|-------------------------|
| Drying    | 130              | 10          | 10       | 1.0 L min <sup>-1</sup> |
| Pyrolysis | 1200             | 100         | 20       | 1.0 L min <sup>-1</sup> |
| Atomize   | 2300             | 1300        | 6        | Stop                    |
| Cleanout  | 2600             | 1100        | 6        | 1.0 L min <sup>-1</sup> |

**Table S2. Order of addition and quantities used in the extraction procedure after optimization**

| Order of addition                                                | Method<br>Blank | Calibration | Application in<br>Samples and<br>CRM | Addition and<br>Recovery in<br>Samples |
|------------------------------------------------------------------|-----------------|-------------|--------------------------------------|----------------------------------------|
| Sample                                                           | -----           | ----        | 10 mL                                | 10 mL                                  |
| Copper Reference Solution (0.50 – 10.0 mg L <sup>-1</sup> )      | -----           | 10 mL       | -----                                | -----                                  |
| Citric Acid Buffer Solution (pH = 5.0, 1.5 mol L <sup>-1</sup> ) | 1 mL            | 1 mL        | 1 mL                                 | 1 mL                                   |
| Triton X-100 Solution (13.0 g L <sup>-1</sup> )                  | 250 µL          | 250 µL      | 250 µL                               | 250 µL                                 |
| DDTC Solution (0.210 mol L <sup>-1</sup> )                       | 750 µL          | 750 µL      | 750 µL                               | 750 µL                                 |
| Deionized Water                                                  | 11 mL           | 1 mL        | 1 mL                                 | -----                                  |
| Copper Reference Solution (5.0 – 100 mg L <sup>-1</sup> )        | -----           | -----       | -----                                | 1 mL                                   |
| Final Volume (Aqueous Phase)                                     | 13 mL           | 13 mL       | 13 mL                                | 13 mL                                  |
| Molten Paraffin Wax added                                        | 700 µL          | 700 µL      | 700 µL                               | 700 µL                                 |
| Extract Collected                                                | 600 µL          | 600 µL      | 600 µL                               | 600 µL                                 |

\* The solutions addition were performed from top to bottom.

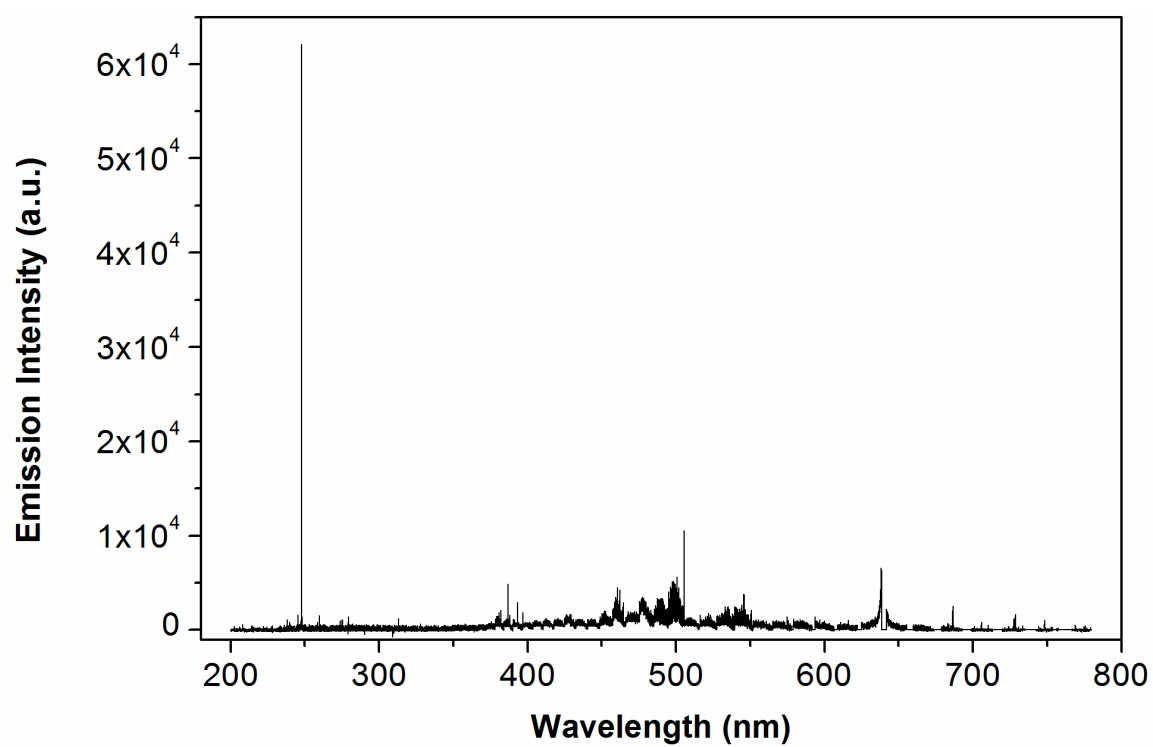

**Figure S1.** LIBS spectrum paraffin wax (method blank) in range 200-780 nm, evidencing the characteristic electronic transition of carbon at C I 247.856 nm.

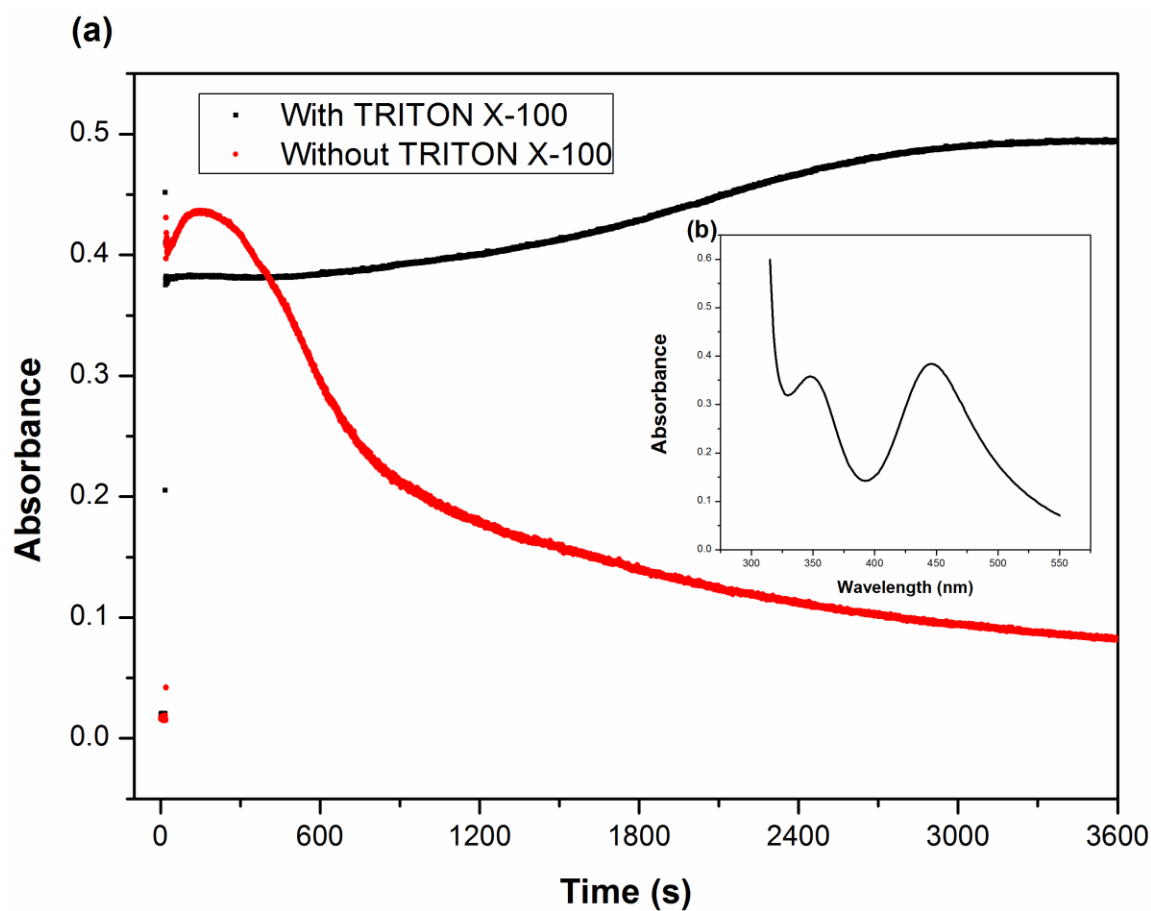

**Figure S2.** Efficiency of Triton X-100 as a protective colloid. (a) Absorbance (446 nm) versus time. Complex solution prepared by the addition of 750  $\mu\text{L}$  of copper reference solution  $0.010 \text{ g L}^{-1}$  in a mixture containing 750  $\mu\text{L}$  of diethyldithiocarbamate solution  $0.021 \text{ mol L}^{-1}$ , 1200  $\mu\text{L}$  of acid citric solution ( $\text{pH} = 5.0$ ;  $1.5 \text{ mol L}^{-1}$ ), 300  $\mu\text{L}$  of Triton X-100 solution  $2.5 \text{ g L}^{-1}$  (in the presence of surfactant) and 300  $\mu\text{L}$  of deionized water (in the absence of surfactant). (b) The inset represent the  $[\text{Cu}(\text{DDTC})_2]$  spectrum in the presence of Triton X-100 and  $\text{pH} = 5.0$ .

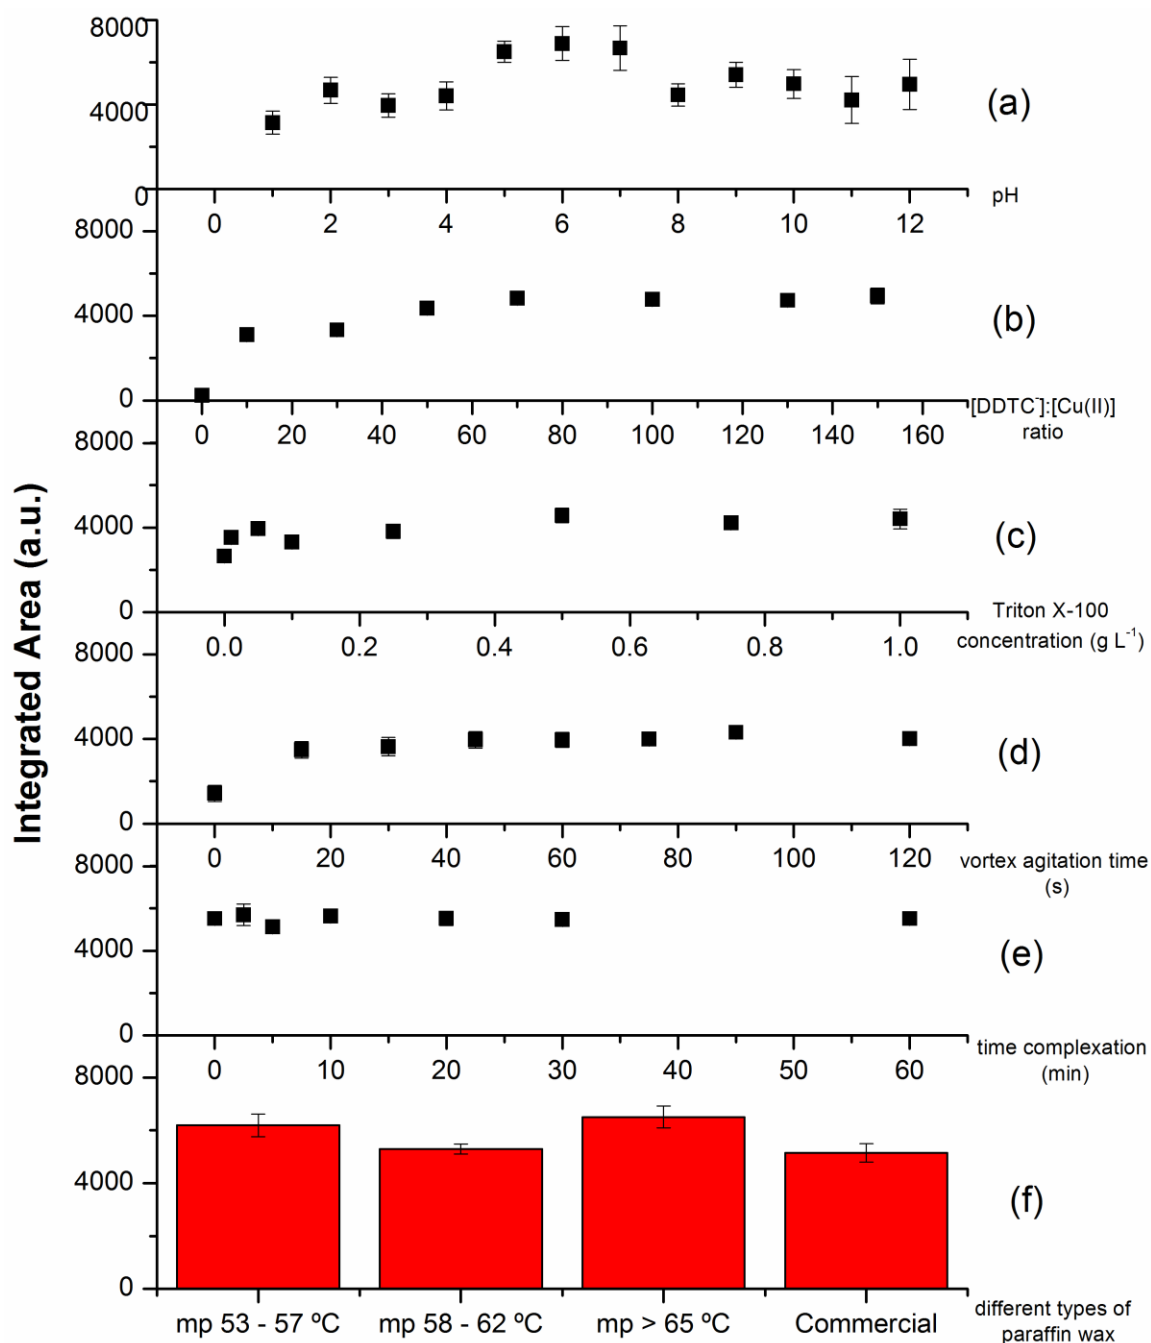

**Figure S3.** Influence of (a) pH; (b) DDTC:Cu(II) ratio; (c) Triton X-100 concentration. (d) vortex agitation time; (e) time complexation and (f) different types of paraffin wax on the analytical signal and the standard deviation obtained by LIBS. Experiments in triplicate ( $n = 3$ ). Fixed  $[Cu^{2+}] = 1.57 \times 10^{-4} \text{ mol L}^{-1}$ , 25 laser pulses of  $50 \text{ J cm}^{-2}$  (230 mJ per pulse;  $750 \text{ }\mu\text{m}$  laser spot size) at  $2.0 \text{ }\mu\text{s}$  delay and  $5.0 \text{ }\mu\text{s}$  integration time.

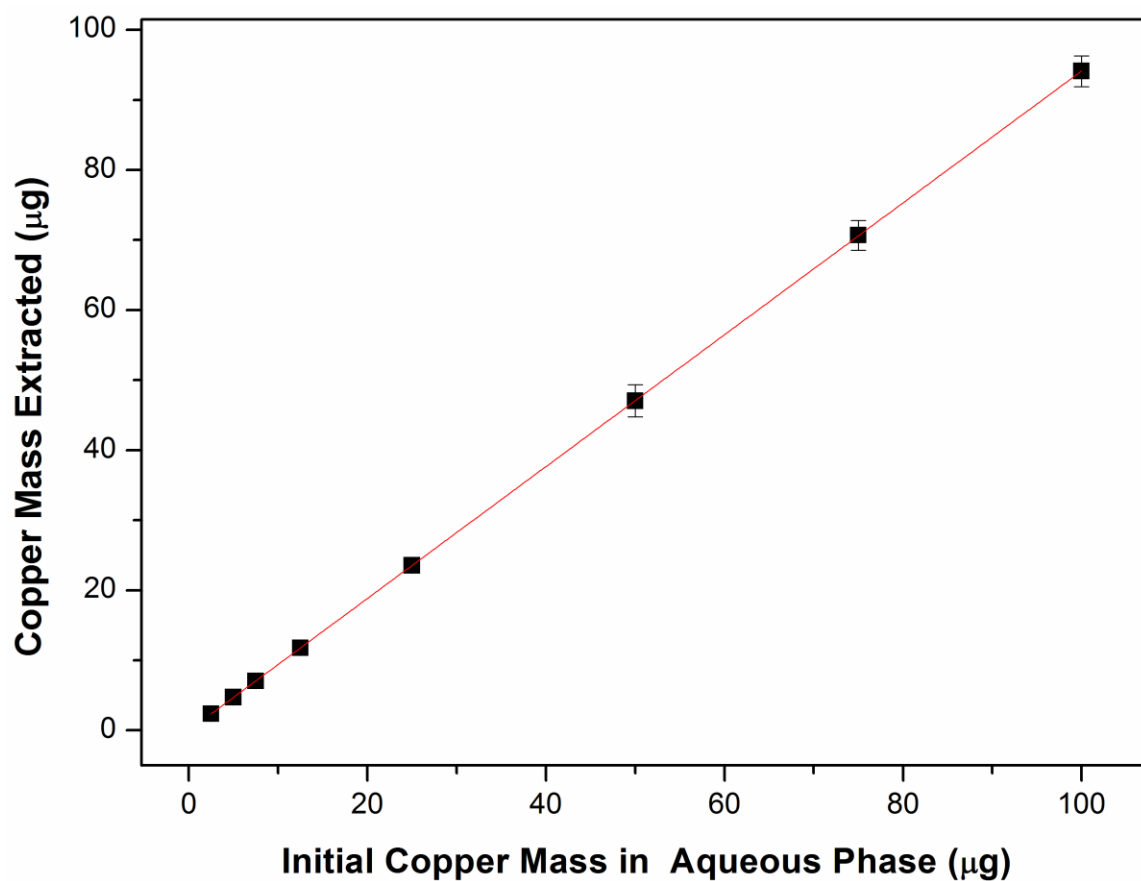

**Figure S4.** Linear regression forcing zero in intercept of the amount of copper extracted in the function of the initial amount in aqueous solution. Linear regression equation ( $y = 0.941 (\pm 0.002) x$ ,  $R^2 = 0.9997$ ,  $n = 7$ ). Vertical error bars refer to  $\pm 1$  standard deviation of triplicate ( $n = 3$ ).

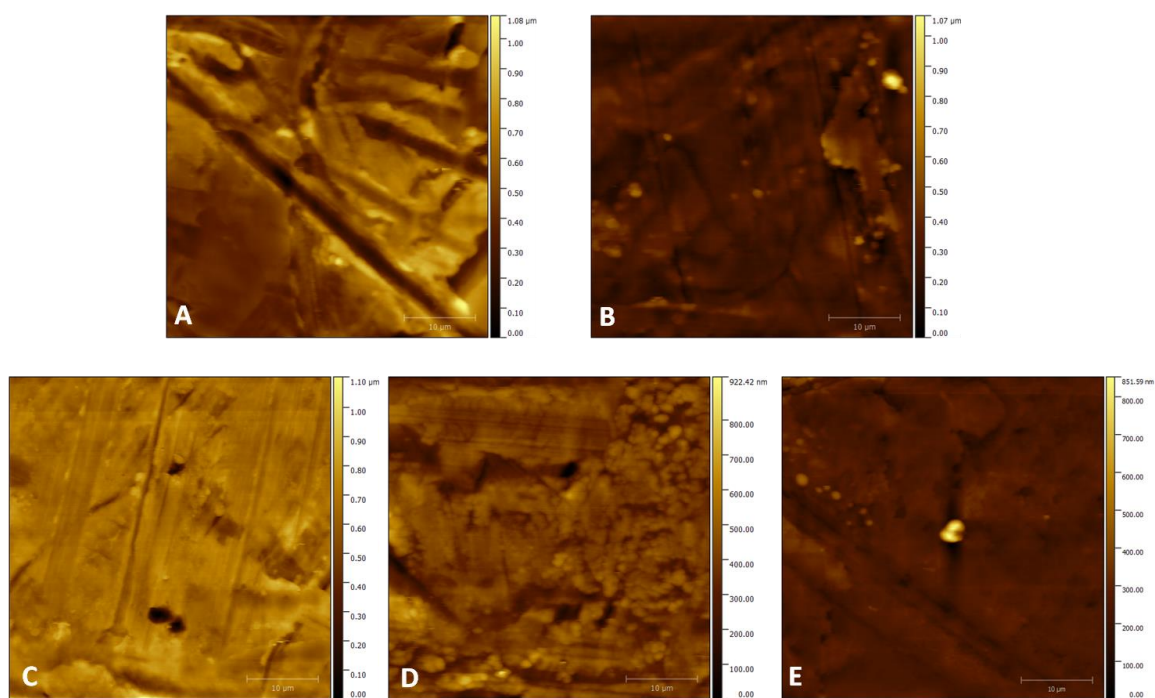

**Figure S5.** AFM images relating to paraffin waxes extracts containing different concentrations of  $[\text{Cu}(\text{DDTC})_2]$ . (A) paraffin wax without  $[\text{Cu}(\text{DDTC})_2]$  – method blank (B) extract to the solution of  $0.75 \text{ mg L}^{-1}$  of copper (C) extract to the solution  $2.50 \text{ mg L}^{-1}$  of copper, (D) extract to the solution  $5.00 \text{ mg L}^{-1}$  of copper and (E) extract to the solution  $7.50 \text{ mg L}^{-1}$  of copper. Each image covered an area of  $45 \mu\text{m} \times 45 \mu\text{m}$  and is representative of three different regions of each sample.



## Supplementary experimental section

Buffer solutions utilized to evaluated pH influence

For the pH adjustment, buffer solutions were prepared in the range from 1 to 12, comprising 0.50 mol L<sup>-1</sup> H<sub>2</sub>C<sub>2</sub>O<sub>4</sub> (Synth) and 0.18 mol L<sup>-1</sup> NaOH (Sigma-Aldrich) to pH 1, 0.50 mol L<sup>-1</sup> KH<sub>2</sub>PO<sub>4</sub> (Sigma-Aldrich) and 0.27 mol L<sup>-1</sup> HNO<sub>3</sub> (Merck) to pH 2, 0.50 mol L<sup>-1</sup> citric acid - C<sub>6</sub>H<sub>8</sub>O<sub>7</sub> (JT Baker) and 0.25 mol L<sup>-1</sup> NaOH to pH 3, 0.50 mol L<sup>-1</sup> C<sub>6</sub>H<sub>8</sub>O<sub>7</sub> and 0.62 mol L<sup>-1</sup> NaOH to pH 4, 0.50 mol L<sup>-1</sup> C<sub>6</sub>H<sub>8</sub>O<sub>7</sub> and 0.95 mol L<sup>-1</sup> NaOH to pH 5, 0.50 mol L<sup>-1</sup> C<sub>6</sub>H<sub>8</sub>O<sub>7</sub> and 1.21 mol L<sup>-1</sup> NaOH to pH 6, 0.31 mol L<sup>-1</sup> KH<sub>2</sub>PO<sub>4</sub> (Sigma-Aldrich) and 0.19 mol L<sup>-1</sup> Na<sub>2</sub>HPO<sub>4</sub> (Sigma-Aldrich) to pH 7, 0.50 mol L<sup>-1</sup> Tris(hydroxymethyl) aminomethane (Sigma-Aldrich) and 0.30 mol L<sup>-1</sup> HNO<sub>3</sub> to pH 8, 0.50 mol L<sup>-1</sup> H<sub>3</sub>BO<sub>3</sub> (Vetec) and 0.22 mol L<sup>-1</sup> NaOH to pH 9, 0.32 mol L<sup>-1</sup> NaHCO<sub>3</sub> (Sigma-Aldrich) and 0.18 mol L<sup>-1</sup> Na<sub>2</sub>CO<sub>3</sub> (Sigma-Aldrich) to pH 10, 0.42 mol L<sup>-1</sup> NaHCO<sub>3</sub> and 0.08 mol L<sup>-1</sup> Na<sub>2</sub>CO<sub>3</sub> to pH 11, 0.50 mol L<sup>-1</sup> Na<sub>2</sub>HPO<sub>4</sub> and 0.23 mol L<sup>-1</sup> NaOH to pH 12.
